# Supplementary material for: Associations between physical activity and emotional and behavioural problems in Chinese children and adolescents with intellectual disabilities
Source: PeerJ. 2025 Feb 14;13:e18949. doi: 10.7717/peerj.18949 (PMC11831971; doi:10.7717/peerj.18949)
Supplement: Supplemental Information 1 [file peerj-13-18949-s001.xlsx]

## Sheet: Sheet1
Personal basic information									emotioanl and behavioral problems (SDQ score)
Numbering	Gender (1=boy;2=girl)	Age	Type of disability	ID severity (2=severe;3=moderate)	Height (cm)	Weight (kg)	BMI	MVPA(min)	Emotional symptoms	Conduct problems	Hyperactivity/inattention	Peer problems	Total difficulties	Prosocial behavior
1	1	16	intellectual disability	2	180	80	24.69	20	4	3	8	6	21	7
2	1	15	intellectual disability	3	140	50	25.51	77	2	7	7	4	20	3
3	2	11	intellectual disability	2	132	33	18.94	69.4	0	3	3	4	10	4
4	1	18	intellectual disability	3	185	62	18.12	66.4	5	1	7	7	20	7
5	1	15	intellectual disability	2	170	45	15.57	25	3	2	5	4	14	8
6	2	14	intellectual disability	2	154	45	18.97	62.1	3	1	5	4	13	9
7	2	13	intellectual disability	3	146	36	16.89	28.8	9	4	10	7	30	3
8	1	18	intellectual disability	3	177	70	22.34	72.5	4	1	7	7	19	7
9	1	17	intellectual disability	2	176	60	19.37	67.3	4	0	3	5	12	8
10	1	17	intellectual disability	3	160	65	25.39	0	8	3	8	6	25	4
11	1	12	intellectual disability	3	140	32	16.33	66.4	4	2	7	6	19	5
12	1	14	intellectual disability	2	160	39	15.23	22.9	2	1	6	5	14	6
13	1	18	intellectual disability	3	170	57	19.72	22.9	2	2	10	3	17	0
14	1	12	intellectual disability	2	157	55	22.31	58.3	4	4	5	4	17	2
15	2	9	intellectual disability	2	127	32	19.84	9.3	3	4	6	3	16	1
16	1	12	intellectual disability	2	152	40	17.31	38.6	4	2	7	8	21	0
17	1	10	intellectual disability	3	135	33	18.11	60	0	3	10	4	17	0
18	1	9	intellectual disability	2	128	21	12.82	11.4	1	4	6	6	17	0
19	2	14	intellectual disability	3	155	37	15.4	28.6	6	2	5	6	19	0
20	2	16	intellectual disability	3	175	65	21.22	104.9	6	2	5	7	20	2
21	1	14	intellectual disability	2	160	50	19.53	60.4	2	1	4	3	10	2
22	1	18	intellectual disability	2	170	60	20.76	133.6	5	3	5	3	16	6
23	1	16	intellectual disability	3	170	60	20.76	15	5	3	9	7	24	1
24	2	12	intellectual disability	2	130	25	14.79	47.7	7	2	5	4	18	5
25	1	18	intellectual disability	2	175	70	22.86	49.3	0	3	6	3	12	8
26	1	11	intellectual disability	2	135	29	15.91	83.9	0	3	5	1	9	1
27	2	17	intellectual disability	2	140	58	29.59	58.1	3	0	3	7	13	7
28	1	10	intellectual disability	2	158	63	25.24	75	1	0	0	5	6	5
29	1	15	intellectual disability	3	186	67	19.37	44.3	4	1	7	8	20	7
30	2	14	intellectual disability	2	150	32	14.22	27.1	4	4	10	6	24	5
31	2	14	intellectual disability	2	153	70	29.9	93.6	5	1	3	4	13	4
32	1	10	intellectual disability	3	130	32	18.93	27.1	0	3	6	7	16	5
33	1	13	intellectual disability	2	160	60	23.44	0	2	0	7	5	14	3
34	2	10	intellectual disability	2	125	31	19.84	49.6	4	2	5	5	16	9
35	1	10	intellectual disability	2	146	33	15.48	0	7	3	6	8	24	5
36	2	9	intellectual disability	2	130	25	14.79	8.6	2	1	8	5	16	3
37	2	10	intellectual disability	3	150	43	19.11	103.5	1	2	9	4	16	3
38	1	10	intellectual disability	2	139	38	19.67	77.1	3	3	6	3	15	5
39	2	11	intellectual disability	2	133	29	16.39	31.4	3	1	9	6	19	7
40	1	9	intellectual disability	3	154	58	24.46	32.3	4	6	8	5	23	6
41	1	9	intellectual disability	3	140	54	27.55	60	0	0	8	4	12	8
42	2	15	intellectual disability	2	155	40	16.65	15.7	7	2	4	4	17	5
43	2	17	intellectual disability	2	153	45	19.22	99.8	0	0	3	5	8	8
44	1	8	intellectual disability	2	123	28.5	18.84	38.6	5	4	5	6	20	5
45	1	9	intellectual disability	2	145	33.5	15.93	8.6	1	1	8	2	12	5
46	1	12	intellectual disability	3	140	45	22.96	60	3	2	3	6	14	5
47	1	12	intellectual disability	2	141	31	15.59	0	1	0	5	3	9	9
48	1	8	intellectual disability	2	120	25	17.36	38.6	1	3	7	5	16	3
49	1	15	intellectual disability	3	180	85	26.23	54.7	4	1	5	7	17	4
50	1	18	intellectual disability	2	170	48	16.61	32.3	6	3	4	5	18	8
51	1	15	intellectual disability	2	166	71	25.77	38.4	6	2	7	4	19	5
52	2	10	intellectual disability	3	130	35	20.71	137.1	3	4	9	4	20	2
53	1	10	intellectual disability	2	125	30	19.2	74.8	1	2	8	5	16	4
54	2	16	intellectual disability	2	166	46	16.69	65.4	7	2	5	3	17	10
55	2	10	intellectual disability	3	150	37	16.44	0	0	1	8	6	15	0
56	1	18	intellectual disability	2	170	75	25.95	66.3	4	4	6	5	19	5
57	1	12	intellectual disability	2	135	28	15.36	51.6	4	1	6	5	16	3
58	1	14	intellectual disability	2	160	48	18.75	53.1	5	0	5	5	15	6
59	1	10	intellectual disability	2	145	39	18.55	11.4	1	1	4	3	9	4
60	1	9	intellectual disability	2	129	30.5	18.44	13.6	3	4	7	4	18	3
61	2	13	intellectual disability	2	150	44	19.56	77.1	0	0	4	3	7	6
62	1	10	intellectual disability	2	138	34	17.85	20	0	0	5	3	8	5
63	2	14	intellectual disability	3	158	72	28.84	105.3	8	3	8	7	26	4
64	2	12	intellectual disability	2	148	50	22.83	5	1	5	7	5	18	5
65	1	13	intellectual disability	2	165	49	18	34.2	3	0	4	3	10	9
66	2	10	intellectual disability	2	138	40	21	10	5	4	5	7	21	6
67	2	17	intellectual disability	2	155	64	26.64	22.9	2	3	6	5	16	9
68	1	10	intellectual disability	2	145	44	20.93	38.6	2	3	5	5	15	5
69	1	13	intellectual disability	2	162	50	19.05	8.6	2	1	6	6	15	6
70	1	17	intellectual disability	2	173	68.5	22.89	10	2	5	6	2	15	5
71	1	10	intellectual disability	3	140	33	16.84	6.4	1	2	2	6	11	5
72	2	10	intellectual disability	2	155	35	14.57	48.6	5	2	7	4	18	1
73	1	14	intellectual disability	2	170	48	16.61	0	5	4	10	9	28	4
74	2	15	intellectual disability	2	165	60	22.04	0	9	3	9	8	29	6
75	2	17	intellectual disability	2	177	86	27.45	10	4	1	7	5	17	9
76	2	10	intellectual disability	2	115	15	11.34	35	1	3	6	6	16	9
77	1	15	intellectual disability	3	154	43	18.13	79	2	2	6	6	16	0
78	1	14	intellectual disability	2	145	45	21.4	0	4	2	5	3	14	7
79	1	15	intellectual disability	2	155	58	24.14	65.1	1	0	6	4	11	5
80	1	11	intellectual disability	2	135	31	17.01	100.5	2	2	6	5	15	5
81	1	9	intellectual disability	2	150	50	22.22	60	2	2	5	5	14	9
82	1	11	intellectual disability	3	140	36	18.37	42.1	3	0	3	6	12	4
83	1	17	intellectual disability	2	163	55	20.7	59.3	5	0	3	2	10	9
84	2	13	intellectual disability	2	145	49	23.31	51.4	5	2	6	5	18	6
85	1	12	intellectual disability	2	138	32	16.8	31.4	0	1	5	3	9	4
86	1	8	intellectual disability	3	126	27	17.01	94.3	3	3	7	5	18	2
87	1	14	intellectual disability	2	156	47	19.31	0	3	9	10	6	28	0
88	1	13	intellectual disability	2	145	45	21.4	20	4	3	4	10	21	10
89	1	10	intellectual disability	3	117	38	27.76	87	1	4	5	4	14	4
90	2	15	intellectual disability	2	160	43	16.8	85.8	2	3	5	5	15	1
91	2	18	intellectual disability	2	150	60	26.67	80.3	3	1	6	4	14	9
92	1	11	intellectual disability	2	157	65	26.37	55.7	5	3	5	5	18	2
93	2	10	intellectual disability	2	142	34	16.86	8.6	5	3	6	7	21	7
94	2	15	intellectual disability	3	165	55	20.2	86.5	1	2	6	3	12	9
95	1	17	intellectual disability	3	176	78	25.18	131.4	0	2	5	3	10	5
96	1	18	intellectual disability	2	180	95	29.32	60	0	0	4	3	7	4
97	1	18	intellectual disability	3	156	58	23.83	68.9	1	2	6	6	15	10
98	2	14	intellectual disability	2	147	41	18.97	46	0	2	7	6	15	4
99	2	17	intellectual disability	2	160	52.5	20.51	23.8	2	2	4	5	13	4
100	1	18	intellectual disability	3	138	34	17.85	72.1	4	1	8	5	18	5
101	1	12	intellectual disability	3	172	70	23.66	60	2	1	7	7	17	5
102	1	12	intellectual disability	2	140	33	16.84	30	0	2	4	3	9	0
103	1	8	intellectual disability	3	142	30	14.88	75.6	4	1	5	5	15	2
104	1	10	intellectual disability	2	133	25	14.13	31.4	2	0	6	6	14	2
105	1	14	intellectual disability	2	170	71	24.57	50.4	6	1	6	6	19	6
106	2	13	intellectual disability	3	150	39	17.33	68.7	1	2	3	6	12	10
107	1	16	intellectual disability	2	183	77.5	23.14	48.6	3	5	7	3	18	6
108	2	11	intellectual disability	2	140	68	34.69	50.7	0	1	6	2	9	1
109	1	9	intellectual disability	2	127	26.7	16.55	38.6	8	2	5	6	21	8
110	1	11	intellectual disability	2	143	35	17.12	55.7	2	0	5	6	13	3
111	2	10	intellectual disability	2	130	28	16.57	85.1	1	0	1	2	4	10
112	1	16	intellectual disability	3	160	60	23.44	65	3	6	6	3	18	7
113	2	16	intellectual disability	2	160	57.5	22.46	2.9	4	2	7	6	19	7
114	2	18	intellectual disability	2	150	62	27.56	71.3	6	1	5	4	16	6
115	2	12	intellectual disability	3	133	35	19.79	74.6	3	1	8	5	17	2
116	1	17	intellectual disability	3	178	83	26.2	80.3	2	1	6	7	16	4
